# Supplementary material for: Chloroplast genome analysis of Angiosperms and phylogenetic relationships among Lamiaceae members with particular reference to teak (Tectona grandis L.f)
Source: bioRxiv or medRxiv preprint supplement (doi:10.1101/2020.05.05.078212), 2020-05-05

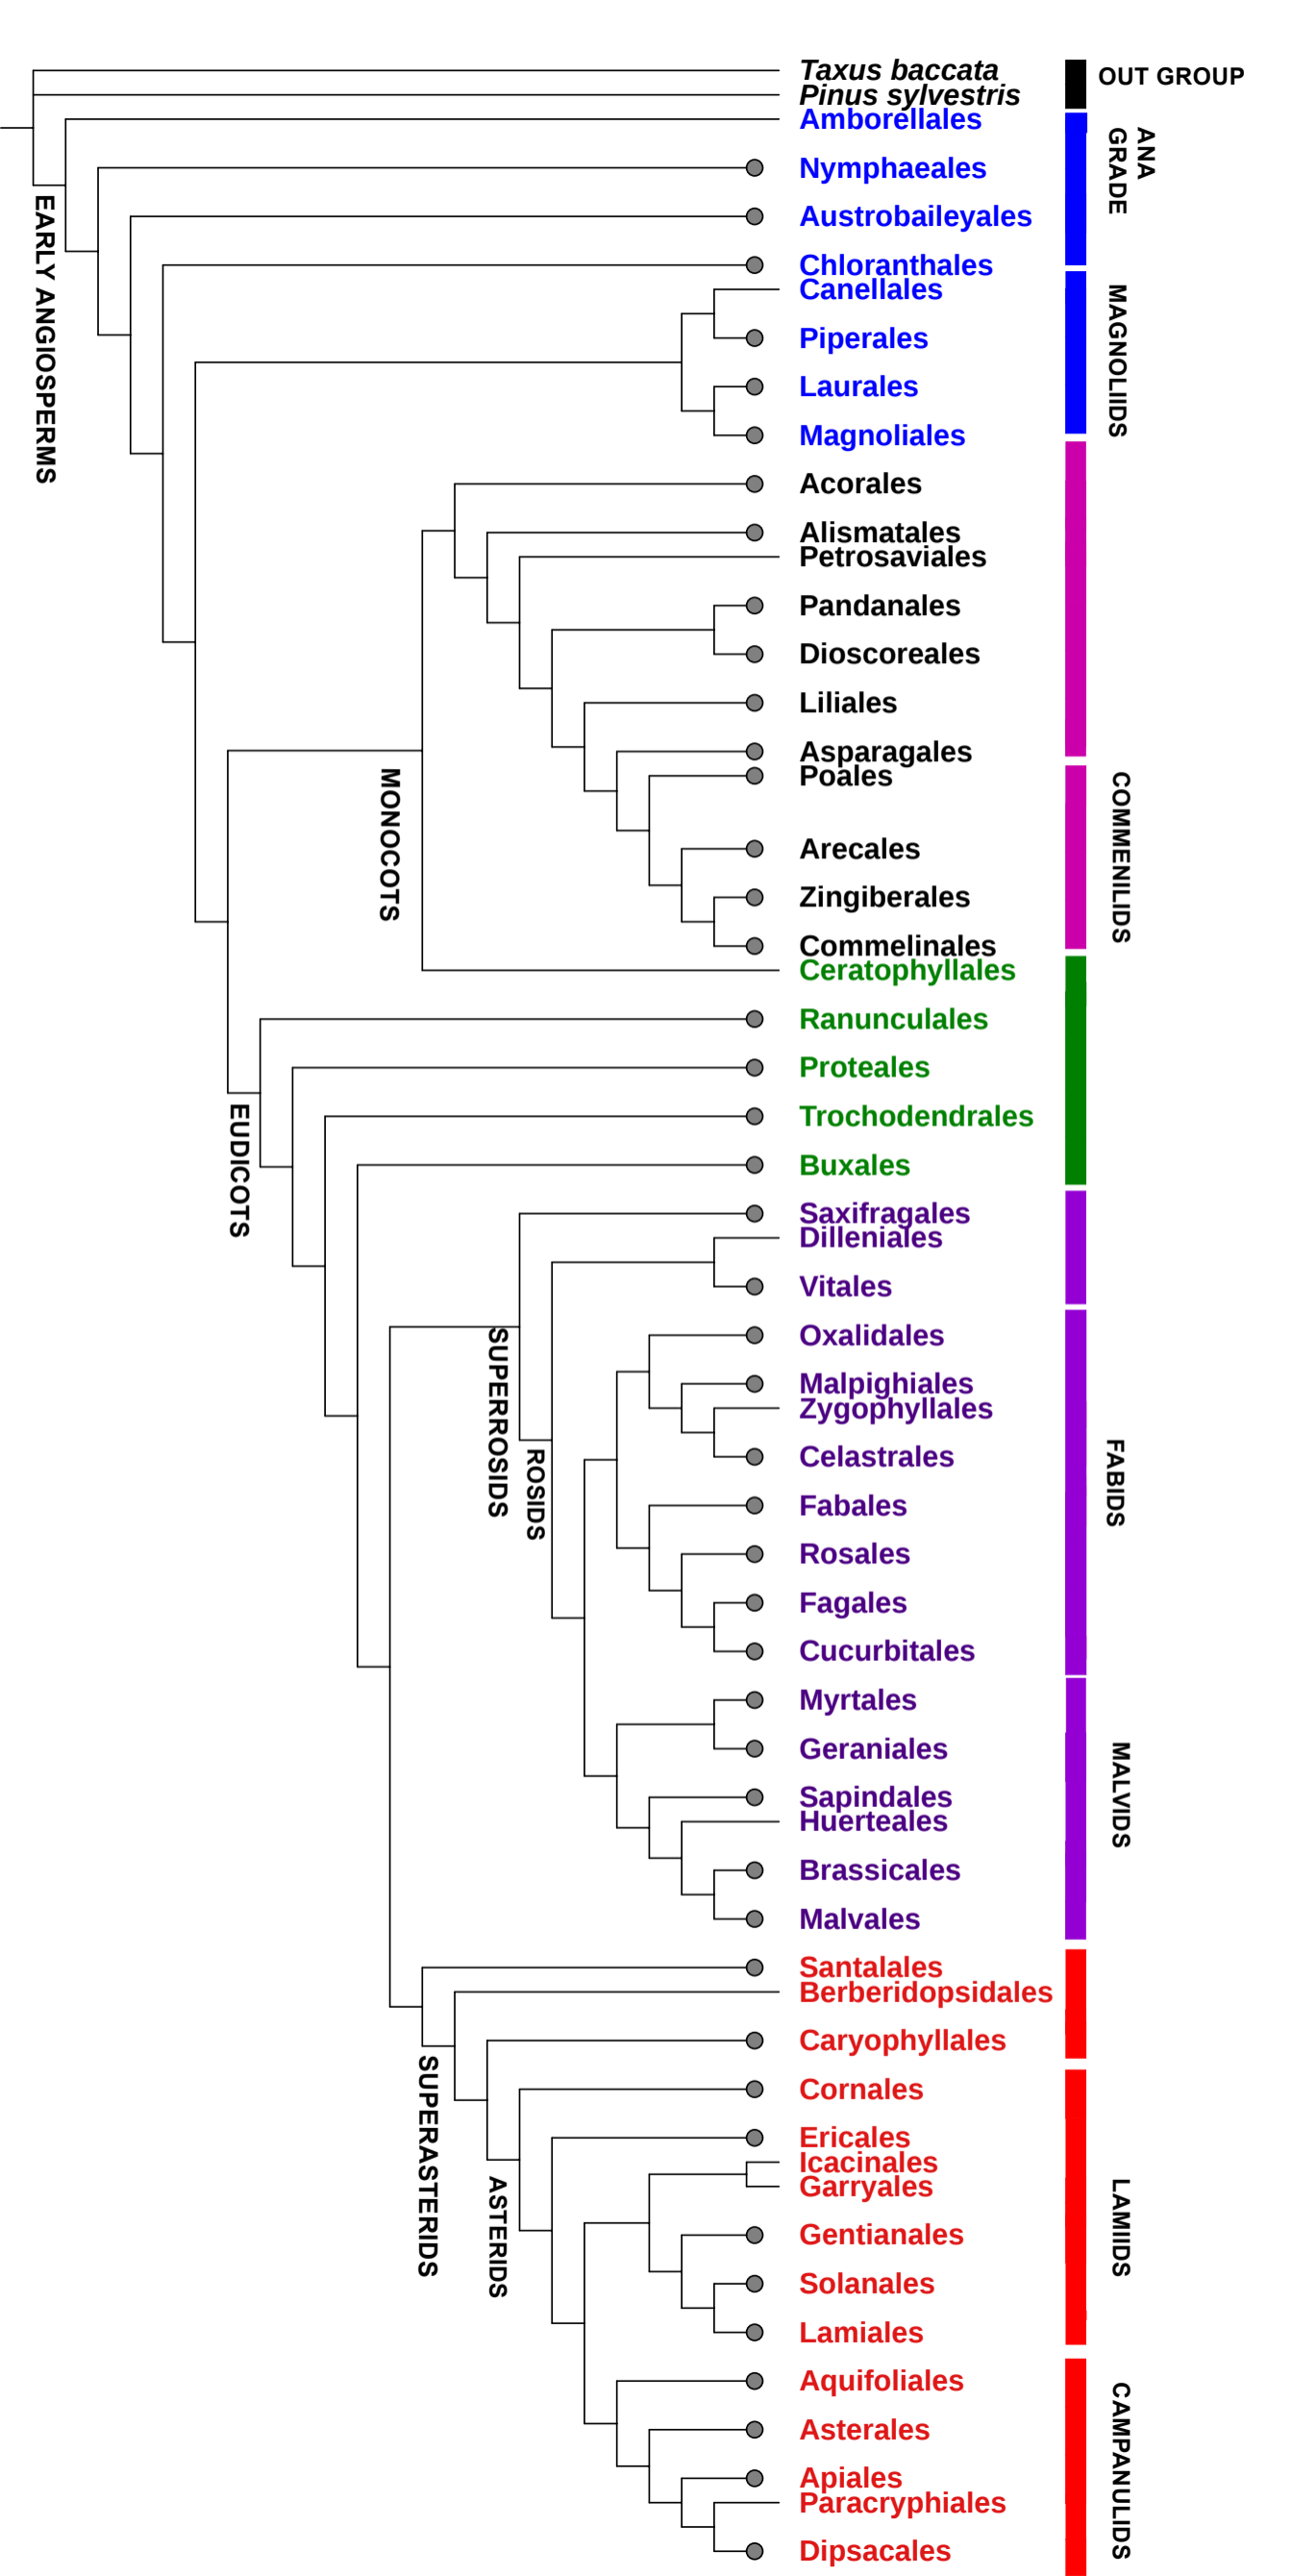

Supplement: Supplementary file [file media-1.pdf]
